# Supplementary material for: Microfluidics-free single-cell genomics with templated emulsification
Source: PubMed Central journal article supplement (PMC10635830; doi:10.1038/s41587-023-01685-z), 2023-03-06
Supplement: 41587_2023_1685_MOESM4_ESM.pdf [file 41587_2023_1685_MOESM4_ESM.pdf]

| Patient ID | Age | Gender | Timepoint | MPAL Subtype | Clinical Immunophenotype                                                                                                                                                                                                                       | Therapy       | Best Response                       |
|------------|-----|--------|-----------|--------------|------------------------------------------------------------------------------------------------------------------------------------------------------------------------------------------------------------------------------------------------|---------------|-------------------------------------|
| 65         | 54  | Male   | Diagnosis | B/Myeloid    | All blasts expressed CD34, CD38, HLA-DR, Majority subset: 82% of blast population expressed variable CD15, CD19, weak CD22, CD79a. Subset expressed TdT. Minority subset: 18% of blast population Expressed weak CD11c, weak CD13, CD33, CD64. | HDACi + Dauno | CR<br>(MRD by flow cytometry 1%)    |
|            |     |        | Relapse   | B/Myeloid    | Expressed weak to absent CD15, CD19, CD38, Subset (69% of blast population) co-expressed CD34 and weak-to-absent CD22.                                                                                                                         |               |                                     |
| 873        | 76  | Female | Diagnosis | B/Myeloid    | Expressed weak CD4, CD13, CD19, weak CD22, CD34, CD38, weak CD71, weak CD123, HLA-DR, Subset co-expressed CD117 (21% of gated events positive). Subset co-expressed CD10 (11% of gated events positive).                                       | miniCVD + Ino | None<br>(MRD by flow cytometry 70%) |
|            |     |        | Relapse   | B/Myeloid    | Expressed weak CD4, CD13, variable CD19, weak-absent CD22, CD33, bright CD34, weak CD38, weak-absent CD64, weak CD71, variable CD117, weak CD123, weak HLA-DR, Minor subset expressed possible CD10.                                           |               |                                     |

CR = Complete Response; HDACi = histone deacetylase inhibitor; Dauno = daunorubicin; MiniCVD = cyclophosphamide and dexamethasone at 50% dose reduction. Ino.= inotuxumab ozogamicin; MRD = measurable residual disease
